# Supplementary material for: Brain metastasis PD-L1 and CD8 expression is dependent on primary tumor type and its PD-L1 and CD8 status
Source: PubMed Central journal article supplement — J Immunother Cancer. 2020 Aug 27;8(2):e000597. doi: 10.1136/jitc-2020-000597 (PMC7454240; doi:10.1136/jitc-2020-000597), 2020-08-27
Supplement: jitc-2020-000597supp005.pdf [file jitc-2020-000597supp005.pdf]

**Table S1. Correlation of brain metastasis immunohistochemical profile with clinical and pathologic features**

|                                                | PD-L1 (n=229) |     |                                 | CD8 peritumoral (n=223) |      |                                 | CD8 intratumoral (n=219) |      |                                 |
|------------------------------------------------|---------------|-----|---------------------------------|-------------------------|------|---------------------------------|--------------------------|------|---------------------------------|
|                                                | No            | Yes | <i>p</i> /<br><i>Cramer's V</i> | Low                     | High | <i>p</i> /<br><i>Cramer's V</i> | Low                      | High | <i>p</i> /<br><i>Cramer's V</i> |
| <b>Primary tumor histological type (n=233)</b> |               |     |                                 |                         |      |                                 |                          |      |                                 |
| Adenocarcinoma                                 | 79            | 26  | 0.8                             | 38                      | 65   | 0.07                            | 62                       | 38   | <b>0.007/0.3</b>                |
| Undifferentiated carcinoma                     | 27            | 10  |                                 | 11                      | 25   |                                 | 23                       | 13   |                                 |
| Melanoma                                       | 20            | 7   |                                 | 3                       | 23   |                                 | 7                        | 20   |                                 |
| Squamous cell carcinoma                        | 18            | 6   |                                 | 7                       | 17   |                                 | 14                       | 7    |                                 |
| Clear cell carcinoma                           | 16            | 3   |                                 | 3                       | 15   |                                 | 6                        | 12   |                                 |
| High grade serous carcinoma                    | 9             | 2   |                                 | 5                       | 6    |                                 | 6                        | 5    |                                 |
| Urothelial carcinoma                           | 2             | 0   |                                 | 3                       | 1    |                                 | 3                        | 1    |                                 |
| Large cell neuroendocrine carcinoma            | 4             | 0   |                                 | 0                       | 1    |                                 | 2                        | 0    |                                 |
| <b>Primary tumor origin (n=233)</b>            |               |     |                                 |                         |      |                                 |                          |      |                                 |
| Lung                                           | 51            | 29  | <b>0.04/0.3</b>                 | 18                      | 60   | <b>0.0002/0.4</b>               | 45                       | 33   | <b>0.008/0.3</b>                |
| Breast                                         | 27            | 4   |                                 | 12                      | 18   |                                 | 19                       | 11   |                                 |
| Gastrointestinal tract                         | 25            | 1   |                                 | 15                      | 11   |                                 | 19                       | 5    |                                 |
| Melanoma                                       | 20            | 7   |                                 | 3                       | 23   |                                 | 7                        | 20   |                                 |
| Kidney                                         | 15            | 3   |                                 | 2                       | 15   |                                 | 6                        | 12   |                                 |
| Ovary                                          | 9             | 3   |                                 | 5                       | 7    |                                 | 5                        | 6    |                                 |
| Head and neck                                  | 8             | 0   |                                 | 5                       | 3    |                                 | 5                        | 1    |                                 |
| Endometrium                                    | 4             | 2   |                                 | 1                       | 5    |                                 | 5                        | 1    |                                 |
| Thyroid gland                                  | 4             | 2   |                                 | 5                       | 1    |                                 | 4                        | 2    |                                 |
| Bladder                                        | 4             | 2   |                                 | 0                       | 5    |                                 | 3                        | 3    |                                 |
| Prostate                                       | 5             | 0   |                                 | 2                       | 3    |                                 | 4                        | 1    |                                 |
| Unknown                                        | 3             | 1   |                                 | 2                       | 2    |                                 | 1                        | 1    |                                 |
| <b>Metastasis localization (n=219)</b>         |               |     |                                 |                         |      |                                 |                          |      |                                 |
| Frontal                                        | 51            | 13  | 0.4                             | 20                      | 42   | 0.7                             | 33                       | 28   | 0.8                             |
| Cerebellar                                     | 49            | 13  |                                 | 16                      | 44   |                                 | 36                       | 24   |                                 |
| Temporal                                       | 20            | 9   |                                 | 9                       | 19   |                                 | 15                       | 13   |                                 |
| Parietal                                       | 21            | 5   |                                 | 8                       | 18   |                                 | 14                       | 11   |                                 |
| Occipital                                      | 16            | 10  |                                 | 9                       | 17   |                                 | 16                       | 9    |                                 |
| Thalamic                                       | 2             | 0   |                                 | 0                       | 2    |                                 | 0                        | 1    |                                 |
| <b>Multiple brain metastases (n=216)</b>       |               |     |                                 |                         |      |                                 |                          |      |                                 |
| Yes                                            | 42            | 11  | 0.5                             | 15                      | 34   | 0.9                             | 27                       | 20   | 0.9                             |
| No                                             | 120           | 40  |                                 | 49                      | 109  |                                 | 88                       | 68   |                                 |
| <b>Brain metastasis size (n=113)</b>           |               |     |                                 |                         |      |                                 |                          |      |                                 |
| ≤ 30 mm                                        | 43            | 16  | 0.4                             | 17                      | 40   | 0.4                             | 33                       | 22   | 0.5                             |
| > 30 mm                                        | 42            | 11  |                                 | 19                      | 33   |                                 | 29                       | 24   |                                 |
| <b>Age</b>                                     |               |     |                                 |                         |      |                                 |                          |      |                                 |
| ≤ 60 years                                     | 86            | 22  | 0.3                             | 30                      | 74   | 0.4                             | 58                       | 65   | 0.8                             |
| > 60 years                                     | 89            | 31  |                                 | 40                      | 78   |                                 | 46                       | 49   |                                 |
| <b>Sex</b>                                     |               |     |                                 |                         |      |                                 |                          |      |                                 |
| M                                              | 103           | 27  | 0.2                             | 39                      | 86   | 0.9                             | 68                       | 55   | 0.7                             |
| F                                              | 72            | 27  |                                 | 31                      | 67   |                                 | 55                       | 41   |                                 |
| <b>Performance status (n=206)</b>              |               |     |                                 |                         |      |                                 |                          |      |                                 |
| 0-1                                            | 104           | 36  | 0.1                             | 42                      | 95   | 0.4                             | 74                       | 60   | 0.1                             |

|                                                                     |     |    |     |    |     |              |     |    |     |
|---------------------------------------------------------------------|-----|----|-----|----|-----|--------------|-----|----|-----|
| 2-4                                                                 | 53  | 10 |     | 22 | 39  |              | 39  | 20 |     |
| <b>Metastases revealing the primary tumor (n=228)</b>               |     |    |     |    |     |              |     |    |     |
| yes                                                                 | 59  | 18 | 0.9 | 21 | 54  | 0.4          | 38  | 33 | 0.5 |
| no                                                                  | 112 | 35 |     | 47 | 96  |              | 82  | 61 |     |
| <b>Symptomatic metastasis with corticosteroid treatment (n=205)</b> |     |    |     |    |     |              |     |    |     |
| Yes                                                                 | 141 | 42 | 0.1 | 60 | 117 | 0.2          | 104 | 70 | 0.2 |
| No                                                                  | 12  | 7  |     | 4  | 16  |              | 8   | 10 |     |
| <b>T stage of the primary tumor (n=86)</b>                          |     |    |     |    |     |              |     |    |     |
| T1-T2                                                               | 29  | 14 | 0.3 | 12 | 29  | 0.5          | 7   | 4  | 0.5 |
| T3-T4                                                               | 32  | 10 |     | 15 | 28  |              | 10  | 11 |     |
| <b>N stage of the primary tumor (n=98)</b>                          |     |    |     |    |     |              |     |    |     |
| Negative                                                            | 33  | 9  | 0.3 | 13 | 28  | 0.3          | 26  | 15 | 0.5 |
| Positive                                                            | 37  | 18 |     | 19 | 36  |              | 30  | 24 |     |
| <b>M stage of the primary tumor (n=103)</b>                         |     |    |     |    |     |              |     |    |     |
| Negative                                                            | 44  | 30 | 0.6 | 22 | 40  | 0.3          | 38  | 22 | 0.3 |
| Positive                                                            | 30  | 10 |     | 10 | 28  |              | 21  | 18 |     |
| <b>Type of brain metastasis material</b>                            |     |    |     |    |     |              |     |    |     |
| Resection                                                           | 145 | 49 | 0.1 | 52 | 138 | <b>0.004</b> | 104 | 87 | 0.1 |
| Biopsy                                                              | 22  | 3  |     | 13 | 10  |              | 13  | 5  |     |

n denotes the number of cases which for the information was available.  
 PD-L1: Programmed death ligand 1

**Table S2. Correlation of primary tumor's immunohistochemical profile with clinical and pathologic features**

|                                                | PD-L1<br>(n=107) |     |          | CD8 peritumoral<br>(n=106) |      |                                 | CD8 intratumoral<br>(n=96) |      |             |
|------------------------------------------------|------------------|-----|----------|----------------------------|------|---------------------------------|----------------------------|------|-------------|
|                                                | No               | Yes | <i>p</i> | Low                        | High | <i>p</i> /<br><i>Cramer's V</i> | Low                        | High | <i>p</i>    |
| <b>Primary tumor histological type (n=233)</b> |                  |     |          |                            |      |                                 |                            |      |             |
| Adenocarcinoma                                 | 30               | 16  | 0.5      | 9                          | 47   | 0.3                             | 20                         | 28   | 0.8         |
| Undifferentiated carcinoma                     | 10               | 3   |          | 1                          | 12   |                                 | 3                          | 8    |             |
| Melanoma                                       | 9                | 3   |          | 2                          | 10   |                                 | 6                          | 6    |             |
| Squamous cell carcinoma                        | 14               | 4   |          | 1                          | 15   |                                 | 6                          | 10   |             |
| Clear cell carcinoma                           | 1                | 2   |          | 0                          | 3    |                                 | 1                          | 2    |             |
| High grade serous carcinoma                    | 1                | 1   |          | 0                          | 2    |                                 | 0                          | 2    |             |
| Urothelial carcinoma                           | 0                | 1   |          | 0                          | 1    |                                 | 0                          | 1    |             |
| Large cell neuroendocrine carcinoma            | 1                | 1   |          | 0                          | 3    |                                 | 1                          | 2    |             |
| <b>Primary tumor origin (n=233)</b>            |                  |     |          |                            |      |                                 |                            |      |             |
| Lung                                           | 39               | 19  | 0.3      | 4                          | 54   | 0.3                             | 16                         | 34   | 0.3         |
| Breast                                         | 10               | 1   |          | 3                          | 8    |                                 | 7                          | 3    |             |
| Gastrointestinal tract                         | 8                | 3   |          | 2                          | 9    |                                 | 5                          | 6    |             |
| Melanoma                                       | 9                | 3   |          | 2                          | 10   |                                 | 6                          | 6    |             |
| Kidney                                         | 1                | 2   |          | 0                          | 3    |                                 | 1                          | 2    |             |
| Ovary                                          | 1                | 1   |          | 0                          | 2    |                                 | 0                          | 2    |             |
| Head and neck                                  | 3                | 0   |          | 1                          | 2    |                                 | 1                          | 1    |             |
| Endometrium                                    | 0                | 0   |          | 0                          | 0    |                                 | 0                          | 0    |             |
| Thyroid gland                                  | 0                | 0   |          | 0                          | 0    |                                 | 0                          | 0    |             |
| Prostate                                       | 0                | 0   |          | 0                          | 0    |                                 | 0                          | 0    |             |
| Unknown                                        | 0                | 0   |          | 0                          | 0    |                                 | 0                          | 0    |             |
| <b>Metastasis location (n=219)</b>             |                  |     |          |                            |      |                                 |                            |      |             |
| Frontal                                        | 15               | 7   | 0.9      | 2                          | 20   | <b>0.02/<br/>0.5</b>            | 5                          | 13   | 0.7         |
| Cerebellar                                     | 20               | 9   |          | 2                          | 26   |                                 | 20                         | 16   |             |
| Temporal                                       | 12               | 6   |          | 1                          | 16   |                                 | 6                          | 9    |             |
| Parietal                                       | 6                | 2   |          | 0                          | 8    |                                 | 2                          | 6    |             |
| Occipital                                      | 9                | 6   |          | 2                          | 13   |                                 | 6                          | 8    |             |
| Thalamic                                       | 1                | 0   |          | 1                          | 0    |                                 | 1                          | 0    |             |
| <b>Multiple brain metastases (n=216)</b>       |                  |     |          |                            |      |                                 |                            |      |             |
| Yes                                            | 18               | 4   | 0.1      | 4                          | 18   | 0.2                             | 10                         | 7    | <b>0.04</b> |
| No                                             | 4                | 26  |          | 7                          | 66   |                                 | 22                         | 46   |             |
| <b>Brain metastasis size (n=113)</b>           |                  |     |          |                            |      |                                 |                            |      |             |
| ≤30 mm                                         | 21               | 8   | 0.6      | 3                          | 26   | 0.4                             | 9                          | 18   | 0.5         |
| >30                                            | 16               | 8   |          | 4                          | 20   |                                 | 9                          | 13   |             |
| <b>Type of primary tumor material (n=105)</b>  |                  |     |          |                            |      |                                 |                            |      |             |
| Resection                                      | 44               | 24  | 0.07     | 10                         | 58   | 0.3                             | 21                         | 45   | <b>0.04</b> |
| Biopsy                                         | 30               | 7   |          | 3                          | 34   |                                 | 15                         | 13   |             |
| <b>T stage</b>                                 |                  |     |          |                            |      |                                 |                            |      |             |
| 1                                              | 22               | 11  | 0.9      | 1                          | 9    | 0.9                             | 4                          | 5    | 0.2         |
| 2                                              | 19               | 9   |          | 2                          | 22   |                                 | 4                          | 18   |             |
| 3                                              | 18               | 10  |          | 2                          | 17   |                                 | 8                          | 11   |             |
| 4                                              | 30               | 12  |          | 1                          | 8    |                                 | 3                          | 3    |             |
| <b>N stage</b>                                 |                  |     |          |                            |      |                                 |                            |      |             |
|                                                | 18               | 10  | 0.5      | 2                          | 26   | 0.4                             | 6                          | 21   | 0.05        |

|                                               |    |    |     |   |    |     |    |    |              |
|-----------------------------------------------|----|----|-----|---|----|-----|----|----|--------------|
| negative                                      | 30 | 12 |     | 6 | 36 |     | 16 | 21 |              |
| positive                                      |    |    |     |   |    |     |    |    |              |
| <b>Sex</b>                                    | 29 | 8  | 0.2 | 7 | 31 | 0.1 | 17 | 16 | 0.05         |
| Female                                        | 47 | 23 |     | 6 | 62 |     | 20 | 43 |              |
| Male                                          |    |    |     |   |    |     |    |    |              |
| <b>Metastasis revealing the primary tumor</b> |    |    |     |   |    |     |    |    |              |
| Yes                                           | 27 | 10 | 0.6 | 4 | 34 | 0.6 | 17 | 14 | <b>0.02</b>  |
| No                                            | 17 | 21 |     | 9 | 57 |     | 19 | 44 |              |
| <b>M stage</b>                                |    |    |     |   |    |     |    |    |              |
| negative                                      | 28 | 15 | 0.4 | 5 | 38 | 0.9 | 8  | 31 | <b>0.005</b> |
| positive                                      | 19 | 7  |     | 3 | 23 |     | 13 | 11 |              |

n denotes the number of cases which for the information was available.

PD-L1: Programmed death ligand 1

**Table S3. Analysis of brain metastasis free survival (from primary tumor diagnosis to brain metastasis diagnosis)**

|                                                                                  | Brain-metastasis free survival (months) | <i>p</i> |
|----------------------------------------------------------------------------------|-----------------------------------------|----------|
| <b>PD-L1 brain-metastasis expression</b>                                         |                                         |          |
| Yes                                                                              | 29                                      | 0.2      |
| No                                                                               | 35                                      |          |
| <b>PD-L1 primary tumor expression</b>                                            |                                         |          |
| Yes                                                                              | 22                                      | 0.6      |
| No                                                                               | 20                                      |          |
| <b>Correlated brain metastasis and primary tumor PD-L1 expression</b>            |                                         |          |
| Yes                                                                              | 22                                      | 0.4      |
| No                                                                               | 25                                      |          |
| <b>CD8 peritumoral brain metastasis expression</b>                               |                                         |          |
| Low                                                                              | 35                                      | 0.3      |
| High                                                                             | 29                                      |          |
| <b>CD8 peritumoral primary tumor expression</b>                                  |                                         |          |
| Low                                                                              | 14                                      | 0.6      |
| High                                                                             | 20                                      |          |
| <b>Correlated brain metastasis and primary tumor peritumoral CD8 expression</b>  |                                         |          |
| Yes                                                                              | 20                                      | 0.05     |
| No                                                                               | 27                                      |          |
| <b>CD8 intratumoral brain metastasis expression</b>                              |                                         |          |
| Low                                                                              | 33                                      | 0.9      |
| High                                                                             | 33                                      |          |
| <b>CD8 intratumoral primary tumor expression</b>                                 |                                         |          |
| Low                                                                              | 17                                      | 0.3      |
| High                                                                             | 20                                      |          |
| <b>Correlated brain metastasis and primary tumor intratumoral CD8 expression</b> |                                         |          |
| Yes                                                                              | 20                                      | 0.9      |
| No                                                                               | 20                                      |          |
| <b>Primary tumor origin</b>                                                      |                                         |          |
| Lung                                                                             | 15                                      | <0.0001  |
| Breast                                                                           | 55                                      |          |
| Melanoma                                                                         | 45                                      |          |
| GI                                                                               | 17                                      |          |
| Renal                                                                            | 21                                      |          |
| Ovary                                                                            | 41                                      |          |
| Head and Neck                                                                    | 41                                      |          |
| <b>Age at brain-metastasis diagnosis</b>                                         |                                         |          |
| > 60 years                                                                       | 34                                      | 0.6      |
| ≤ 60 years                                                                       | 32                                      |          |
| <b>Sex</b>                                                                       |                                         |          |
| Female                                                                           | 39                                      | 0.004    |
| Male                                                                             | 27                                      |          |

|                                     |    |             |
|-------------------------------------|----|-------------|
| <b>Histologic type</b>              |    |             |
| Adenocarcinoma                      | 32 | <b>0.01</b> |
| Squamous cell carcinoma             | 20 |             |
| Clear cell carcinoma                | 41 |             |
| Melanoma                            | 45 |             |
| Undifferentiated                    | 41 |             |
| Large cell neuroendocrine carcinoma | 12 |             |
| <b>T stage of the primary tumor</b> |    |             |
| 1-2                                 | 27 | 0.8         |
| 3-4                                 | 27 |             |
| <b>N stage of the primary tumor</b> |    |             |
| N-                                  | 33 | 0.1         |
| N+                                  | 27 |             |
| <b>M stage of the primary tumor</b> |    |             |
| M0                                  | 27 | 0.8         |
| M1                                  | 29 |             |

PD-L1: Programmed death ligand 1, GI: gastrointestinal,

### Supplementary figure legends

**Figure S1.** A. Overall survival (OS) after brain metastasis diagnosis. B. OS according to sex C. OS according to age. D. Time to brain metastasis development after the diagnosis of the primary tumor represented as progression-free survival (PFS) E. PFS according to sex. F. Tumors with concordant CD8 expression between the primary tumor and the metastasis have shorter time to brain metastasis development.

**Figure S2.** Simple regression analysis comparing PD-L1 expression (in %) between brain metastasis and paired primary tumors

**Figure S3.** Comparison of PD-L1 and CD8 expression between brain metastasis and corresponding primary tumor.

*BM=brain metastasis, PT=primary tumor*

**Figure S4.** A. Overall survival after brain metastasis diagnosis according to performance status. B. Overall survival after brain metastasis diagnosis

according to the administration of adjuvant treatment.
