# Supplementary figures and images for: Brain metastasis PD-L1 and CD8 expression is dependent on primary tumor type and its PD-L1 and CD8 status
Source: PubMed Central journal article supplement — J Immunother Cancer. 2020 Aug 27;8(2):e000597. doi: 10.1136/jitc-2020-000597 (PMC7454240; doi:10.1136/jitc-2020-000597), 2020-08-27

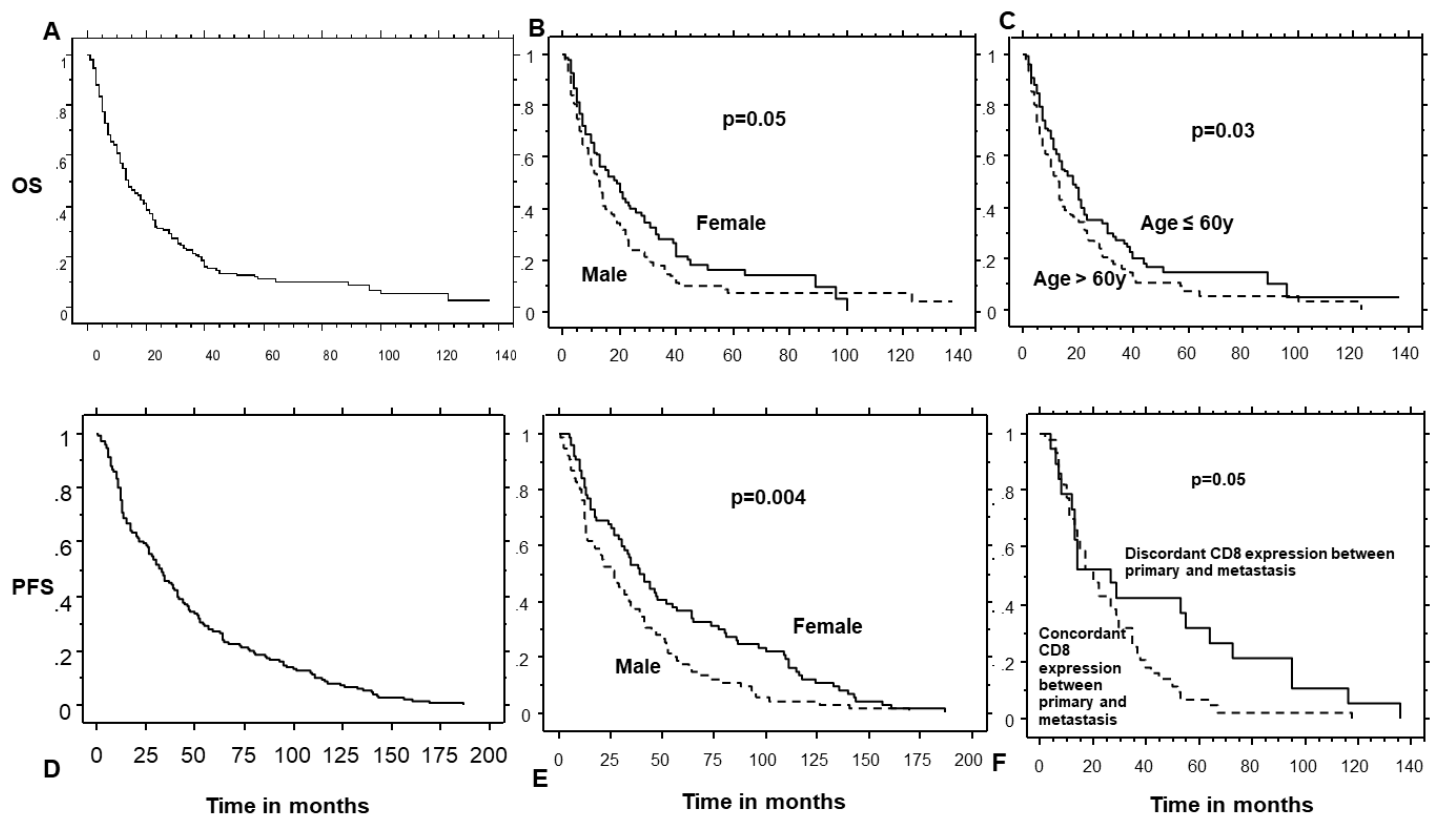

Supplement: jitc-2020-000597supp001.pdf [file jitc-2020-000597supp001.pdf]

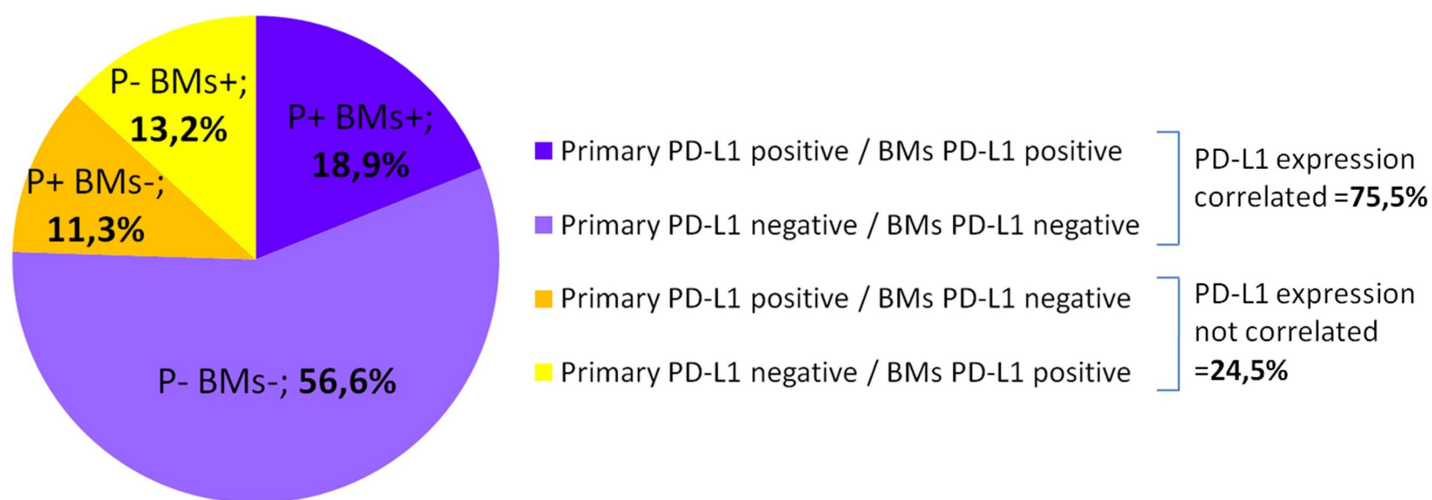

Supplement: jitc-2020-000597supp002.pdf [file jitc-2020-000597supp002.pdf]

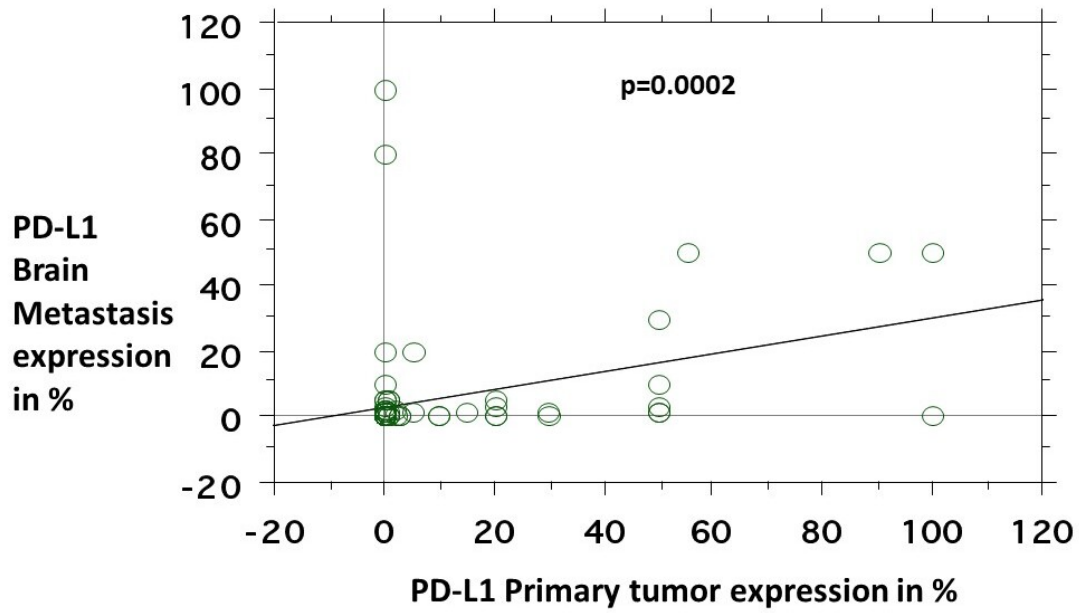

Supplement: jitc-2020-000597supp003.pdf [file jitc-2020-000597supp003.pdf]

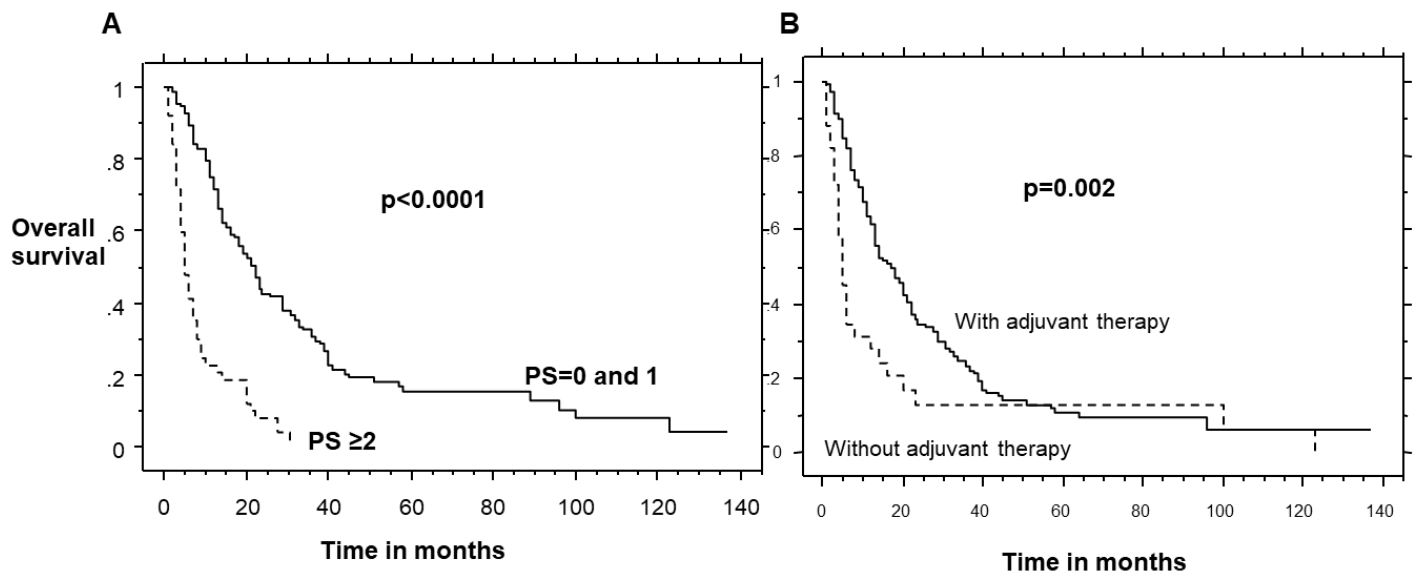

Supplement: jitc-2020-000597supp004.pdf [file jitc-2020-000597supp004.pdf]
